# Supplementary material for: Surface Modification Strategy for Enhanced NO2 Capture in Metal–Organic Frameworks
Source: MDPI journal article supplement (doi:10.3390/molecules27113448), 2022-05-26
Supplement: s1 [file s1]

Supporting Information for:

# Surface Modification Strategy for Enhanced NO<sub>2</sub> Capture in Metal–Organic Frameworks

Dionysios Raptis <sup>1</sup>, Charalampos Livas <sup>1</sup>, George Stavroglou <sup>1</sup>, Rafaela Maria Giappa <sup>1,2</sup>,  
Emmanuel Tylianakis <sup>2</sup>, Taxiarchis Stergiannakos <sup>1</sup> and George E. Froudakis <sup>1,\*</sup>

<sup>1</sup> Department of Chemistry, University of Crete, Voutes Campus, GR-71003 Heraklion Crete, Greece;  
chemp1100@edu.chemistry.uoc.gr (D.R.); chemp1085@edu.chemistry.uoc.gr (C.L.);  
chemp1101@edu.chemistry.uoc.gr (G.S.); chemp956@edu.chemistry.uoc.gr (R.M.G.);  
sterg\_t@chemistry.uoc.gr (T.S.)

<sup>2</sup> Department of Materials Science and Technology, University of Crete, Voutes Campus, GR-71003 Heraklion Crete, Greece;  
tilman@materials.uoc.gr

## Density Functional Theory

**Table S1.** Sorted binding energies (kcal/mol) of the NO<sub>2</sub>...C<sub>6</sub>H<sub>5</sub>-X systems under study, calculated at the RI-DSD-BLYP D3(BJ) /def2-TZVPP level of theory. All interaction energy values have been corrected for the Basis Set Superposition Error (BSSE) by the full counterpoise method [38]. Percentage of binding energy enhancement with the introduction of the FG compared to benzene.

| System                                                                            | Binding Energy<br>(kcal/mol) | Binding Energy<br>Enhancement (%) |
|-----------------------------------------------------------------------------------|------------------------------|-----------------------------------|
| NO <sub>2</sub> ...C <sub>6</sub> H <sub>5</sub> -OSO <sub>3</sub> H              | -5.4                         | 170%                              |
| NO <sub>2</sub> ...C <sub>6</sub> H <sub>5</sub> -OPO <sub>3</sub> H <sub>2</sub> | -4.6                         | 131%                              |
| NO <sub>2</sub> ...C <sub>6</sub> H <sub>5</sub> -PO <sub>3</sub> H <sub>2</sub>  | -4.2                         | 110%                              |
| NO <sub>2</sub> ...C <sub>6</sub> H <sub>5</sub> -OCONH <sub>2</sub>              | -3.4                         | 70%                               |
| NO <sub>2</sub> ...C <sub>6</sub> H <sub>5</sub> -C(OH) <sub>3</sub>              | -3.4                         | 70%                               |
| NO <sub>2</sub> ...C <sub>6</sub> H <sub>5</sub> -SO <sub>3</sub> H               | -3.4                         | 70%                               |
| NO <sub>2</sub> ...C <sub>6</sub> H <sub>5</sub> -CONH <sub>2</sub>               | -3.0                         | 50%                               |
| NO <sub>2</sub> ...C <sub>6</sub> H <sub>5</sub> -SOOH                            | -2.9                         | 44%                               |
| NO <sub>2</sub> ...C <sub>6</sub> H <sub>5</sub> -COOH                            | -2.9                         | 44%                               |
| NO <sub>2</sub> ...C <sub>6</sub> H <sub>5</sub> -CH <sub>2</sub> OH              | -2.9                         | 44%                               |
| NO <sub>2</sub> ...C <sub>6</sub> H <sub>5</sub> -OOH                             | -2.8                         | 41%                               |
| NO <sub>2</sub> ...C <sub>6</sub> H <sub>5</sub> -CNH <sub>2</sub> NOH            | -2.8                         | 41%                               |
| NO <sub>2</sub> ...C <sub>6</sub> H <sub>5</sub> -CH <sub>2</sub> N <sub>3</sub>  | -2.7                         | 36%                               |
| NO <sub>2</sub> ...C <sub>6</sub> H <sub>5</sub> -CONHNH <sub>2</sub>             | -2.7                         | 36%                               |
| NO <sub>2</sub> ...C <sub>6</sub> H <sub>5</sub> -CONHCH <sub>3</sub>             | -2.7                         | 36%                               |
| NO <sub>2</sub> ...C <sub>6</sub> H <sub>5</sub> -SO <sub>2</sub> NH <sub>2</sub> | -2.7                         | 36%                               |
| NO <sub>2</sub> ...C <sub>6</sub> H <sub>5</sub> -NCH <sub>2</sub>                | -2.7                         | 36%                               |
| NO <sub>2</sub> ...C <sub>6</sub> H <sub>5</sub> -CH <sub>2</sub> NH <sub>2</sub> | -2.6                         | 31%                               |
| NO <sub>2</sub> ...C <sub>6</sub> H <sub>5</sub> -NNH                             | -2.6                         | 31%                               |
| NO <sub>2</sub> ...C <sub>6</sub> H <sub>5</sub> -CHNOH                           | -2.5                         | 26%                               |
| NO <sub>2</sub> ...C <sub>6</sub> H <sub>5</sub> -NHCOCH <sub>3</sub>             | -2.5                         | 26%                               |
| NO <sub>2</sub> ...C <sub>6</sub> H <sub>5</sub> -NH <sub>2</sub>                 | -2.4                         | 21%                               |
| NO <sub>2</sub> ...C <sub>6</sub> H <sub>5</sub> -O <sub>2</sub> CH <sub>2</sub>  | -2.4                         | 21%                               |
| NO <sub>2</sub> ...C <sub>6</sub> H <sub>5</sub> -OC <sub>2</sub> H <sub>5</sub>  | -2.3                         | 16%                               |
| NO <sub>2</sub> ...C <sub>6</sub> H <sub>5</sub> -CH <sub>3</sub>                 | -2.3                         | 16%                               |

|                                                                                        |      |      |
|----------------------------------------------------------------------------------------|------|------|
| NO <sub>2</sub> ...C <sub>6</sub> H <sub>5</sub> - <b>PH<sub>2</sub></b>               | -2.3 | 16%  |
| NO <sub>2</sub> ...C <sub>6</sub> H <sub>5</sub> - <b>COOCH<sub>3</sub></b>            | -2.2 | 11%  |
| NO <sub>2</sub> ...C <sub>6</sub> H <sub>5</sub> - <b>SO<sub>2</sub>CH<sub>3</sub></b> | -2.2 | 11%  |
| NO <sub>2</sub> ...C <sub>6</sub> H <sub>5</sub> - <b>CHNH</b>                         | -2.2 | 11%  |
| NO <sub>2</sub> ...C <sub>6</sub> H <sub>5</sub> - <b>COOCHO</b>                       | -2.2 | 11%  |
| NO <sub>2</sub> ...C <sub>6</sub> H <sub>5</sub> - <b>CHO</b>                          | -2.2 | 11%  |
| NO <sub>2</sub> ...C <sub>6</sub> H <sub>5</sub> - <b>CF<sub>3</sub></b>               | -2.1 | 6%   |
| NO <sub>2</sub> ...C <sub>6</sub> H <sub>5</sub> - <b>SH</b>                           | -2.1 | 6%   |
| NO <sub>2</sub> ...C <sub>6</sub> H <sub>5</sub> - <b>N<sub>3</sub></b>                | -2.1 | 6%   |
| NO <sub>2</sub> ...C <sub>6</sub> H <sub>5</sub> - <b>NCO</b>                          | -2.0 | 0%   |
| NO <sub>2</sub> ...C <sub>6</sub> H <sub>5</sub> - <b>CHCHNO<sub>2</sub></b>           | -2.0 | 0%   |
| NO <sub>2</sub> ...C <sub>6</sub> H <sub>5</sub> - <b>H</b>                            | -2.0 | 0%   |
| NO <sub>2</sub> ...C <sub>6</sub> H <sub>5</sub> - <b>NCS</b>                          | -1.9 | -5%  |
| NO <sub>2</sub> ...C <sub>6</sub> H <sub>5</sub> - <b>F</b>                            | -1.9 | -5%  |
| NO <sub>2</sub> ...C <sub>6</sub> H <sub>5</sub> - <b>CN</b>                           | -1.9 | -5%  |
| NO <sub>2</sub> ...C <sub>6</sub> H <sub>5</sub> - <b>SCN</b>                          | -1.9 | -5%  |
| NO <sub>2</sub> ...C <sub>6</sub> H <sub>5</sub> - <b>SO<sub>2</sub>Cl</b>             | -1.7 | -15% |
| NO <sub>2</sub> ...C <sub>6</sub> H <sub>5</sub> - <b>NC</b>                           | -1.6 | -20% |
| NO <sub>2</sub> ...C <sub>6</sub> H <sub>5</sub> - <b>OH</b>                           | -1.5 | -25% |

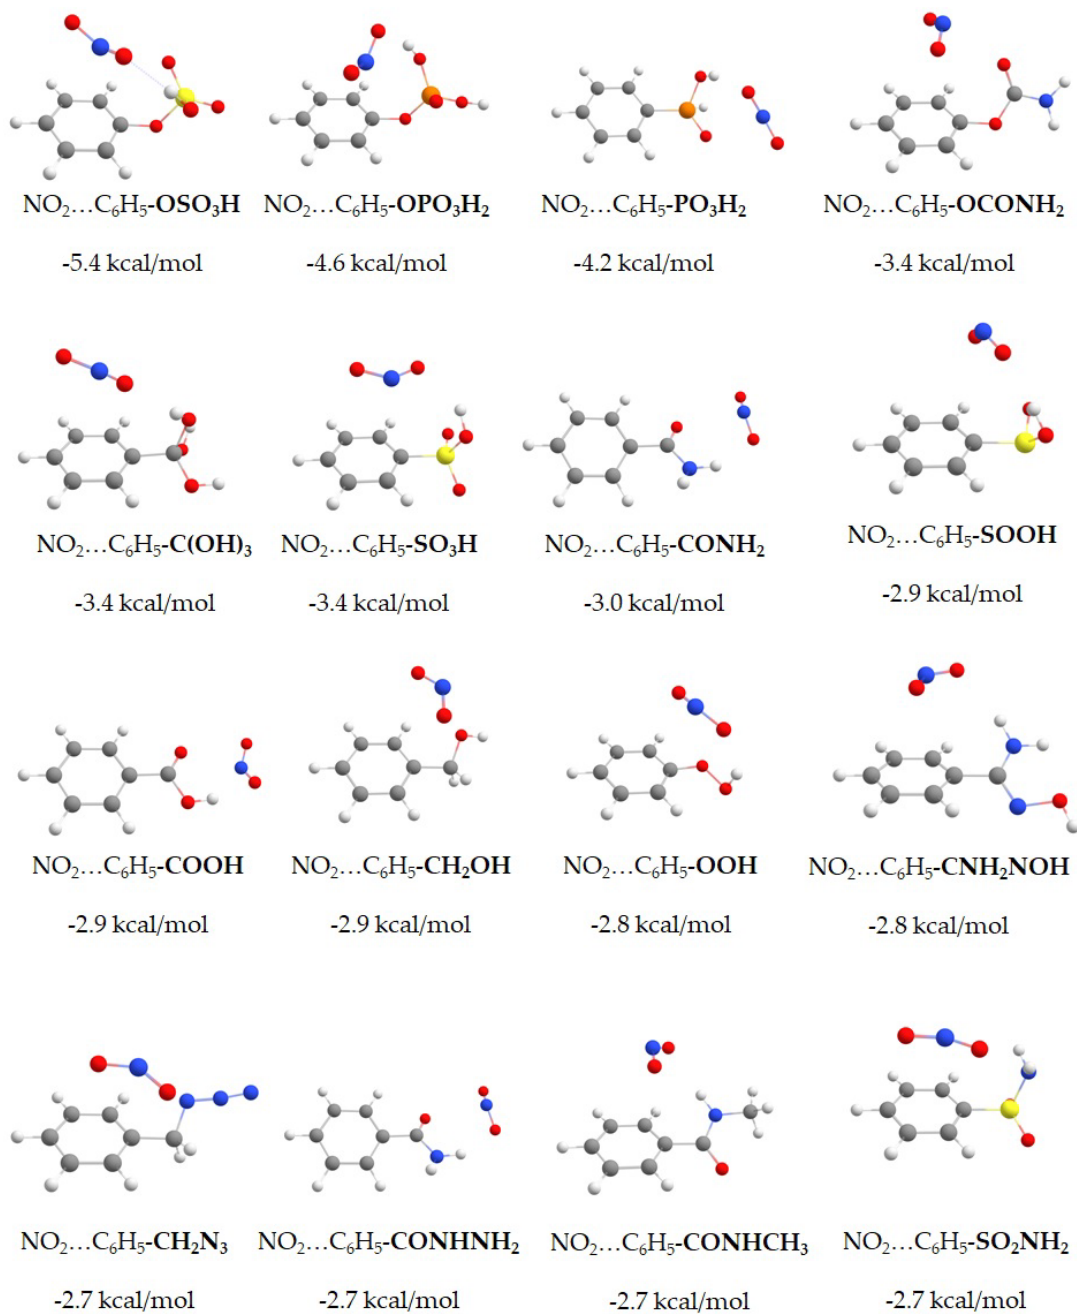

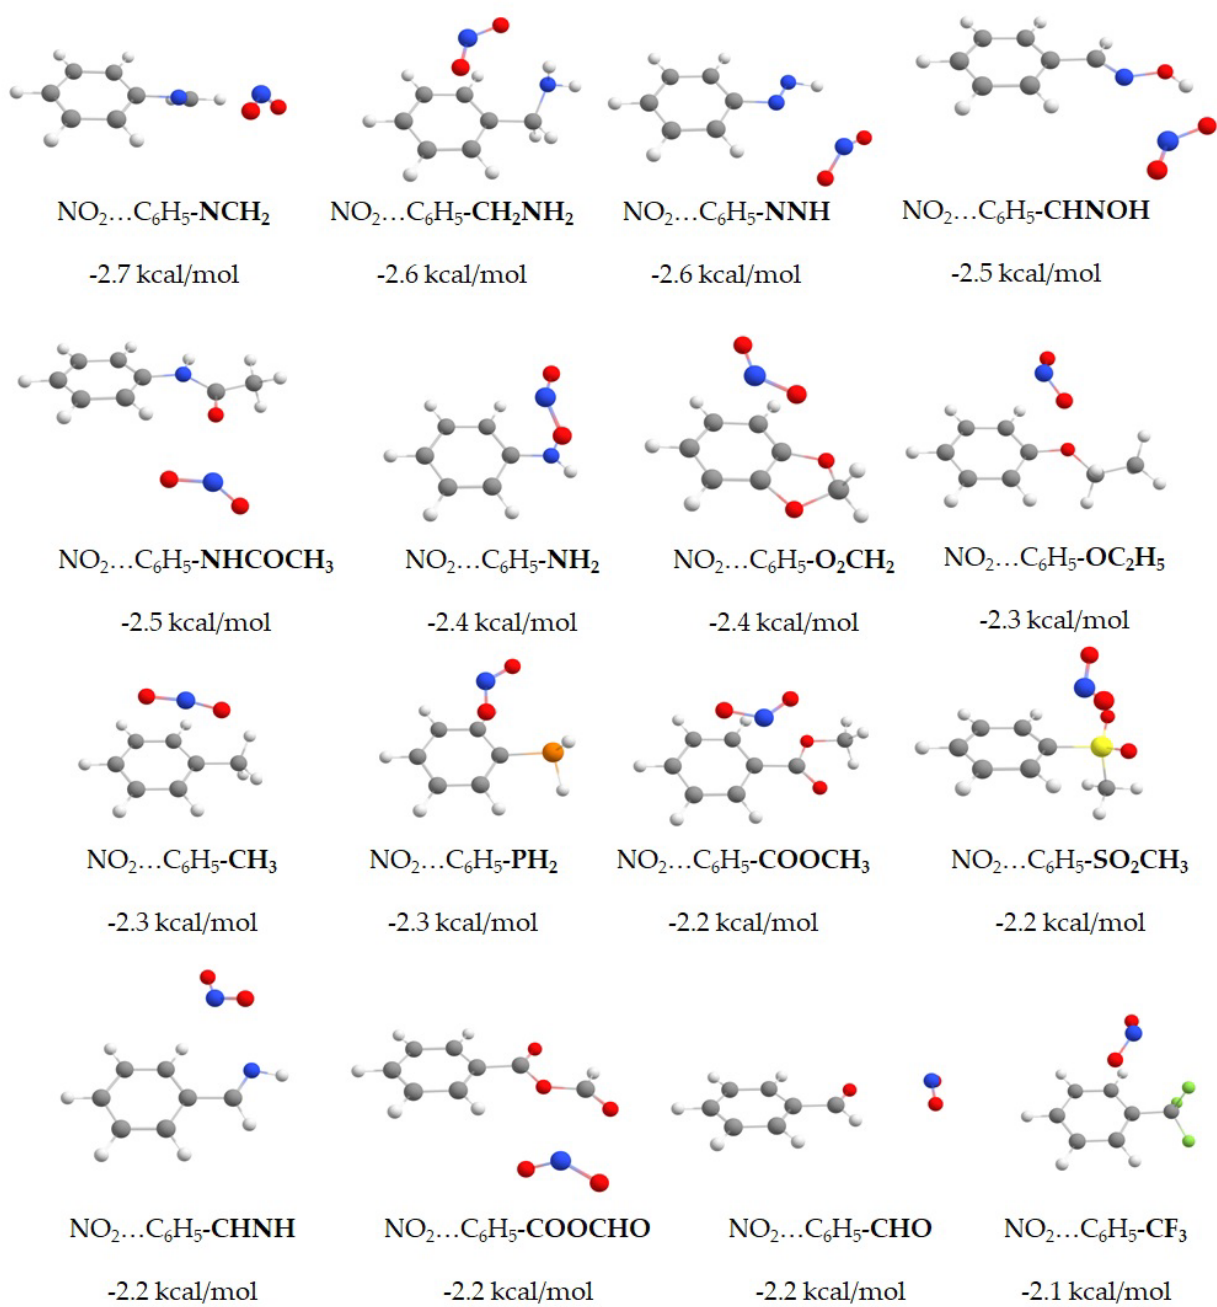

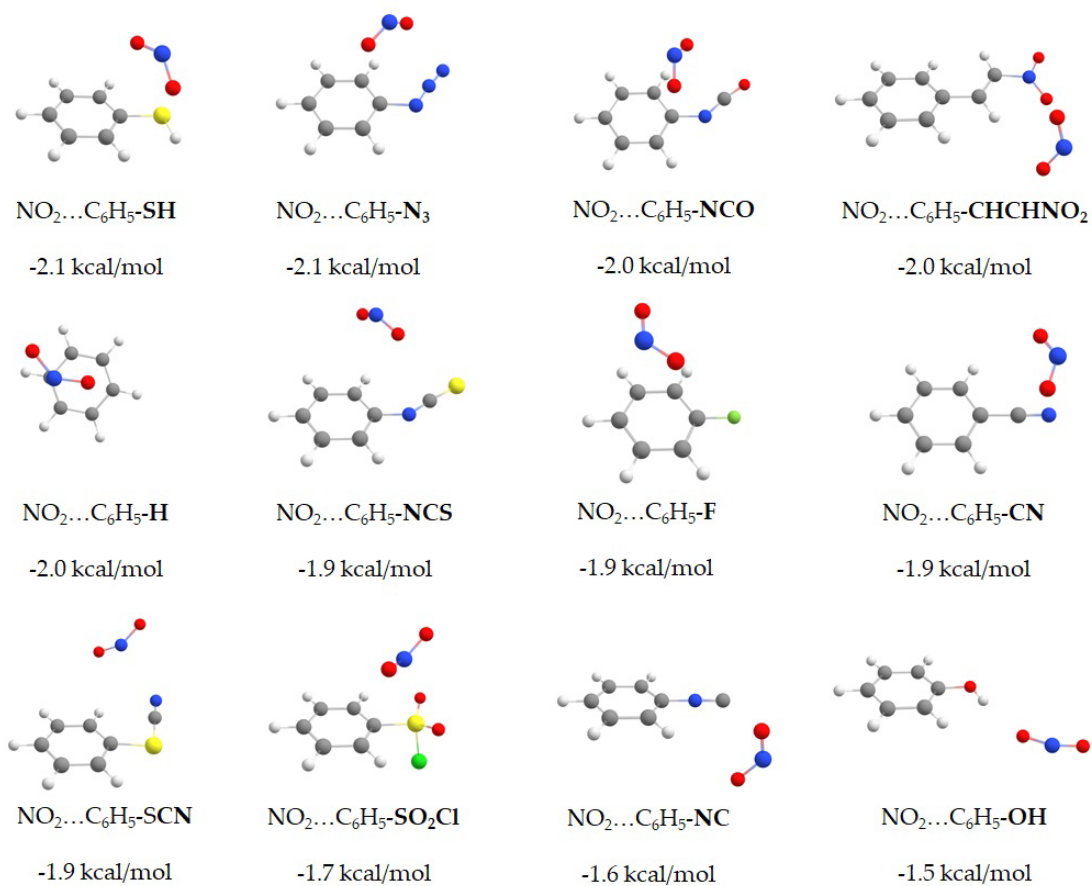

**Figure S1.** Global minima geometries and binding energy values (in kcal/mol) of all the systems in this study.

Densities were plotted with a contour value of 0.001 au by using gOpenMol [39,40] and are shown in Figure S2.

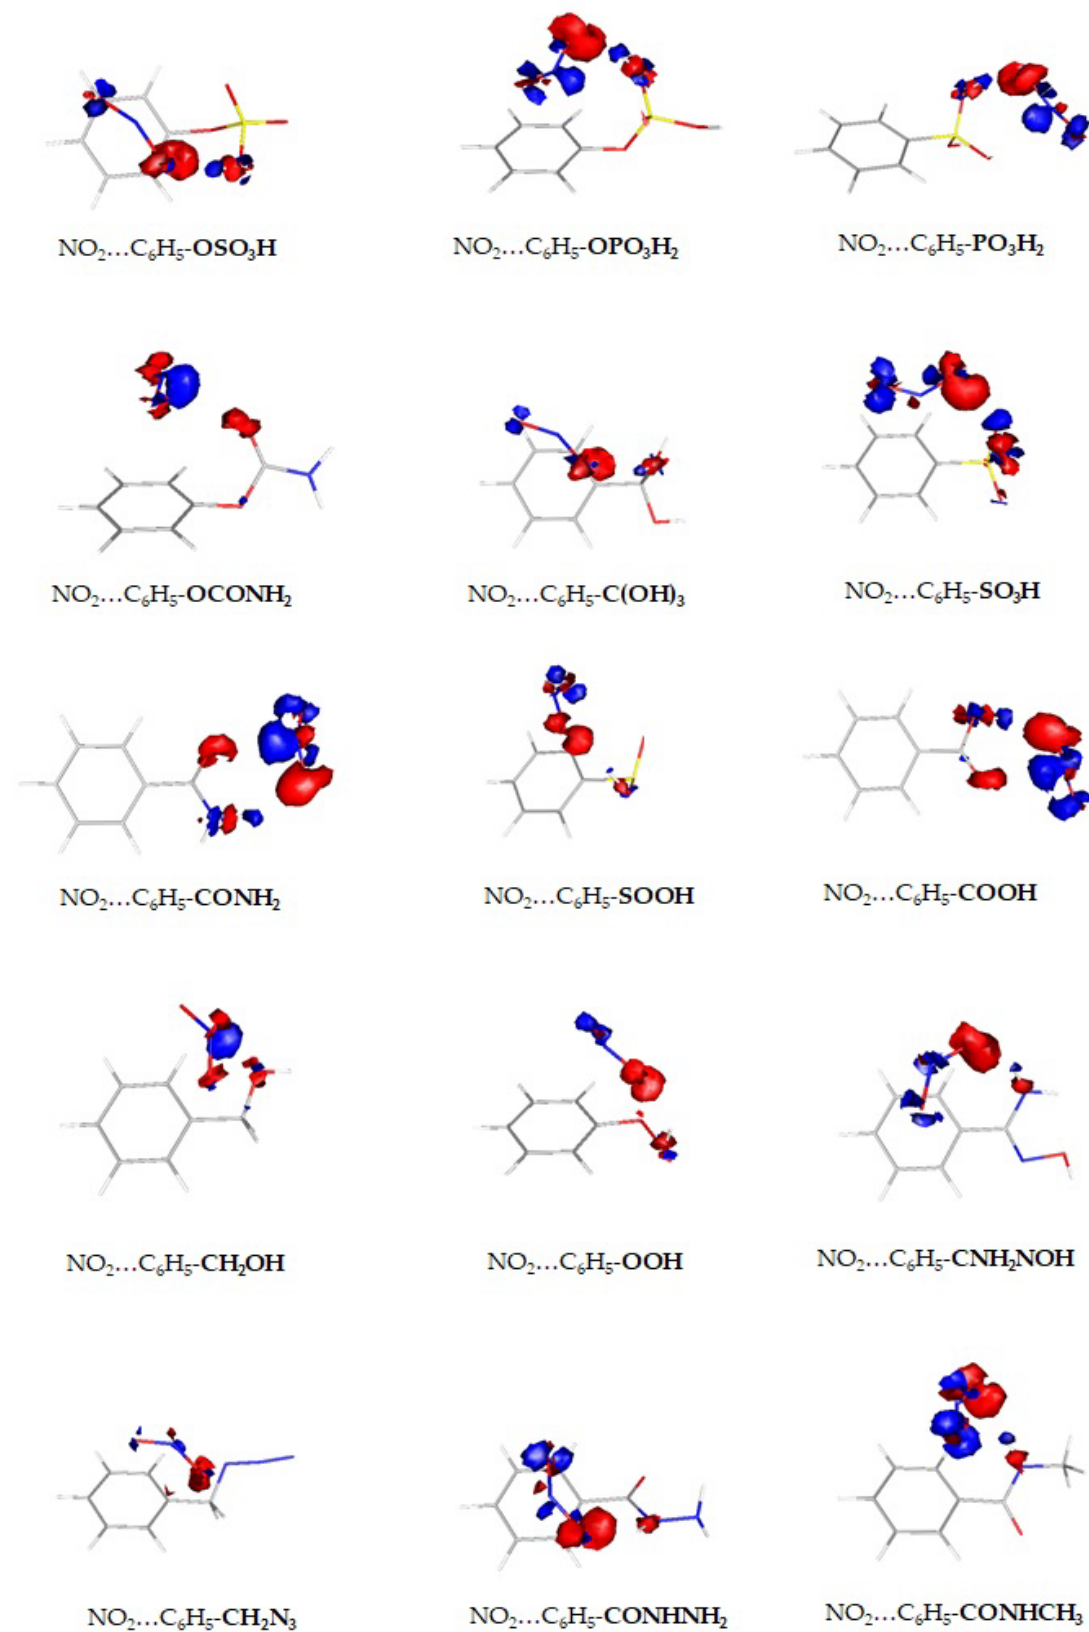

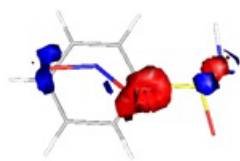

NO<sub>2</sub>...C<sub>6</sub>H<sub>5</sub>.SO<sub>2</sub>NH<sub>2</sub>

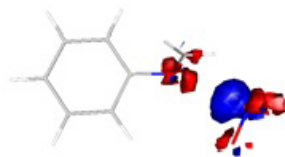

NO<sub>2</sub>...C<sub>6</sub>H<sub>5</sub>.NCH<sub>2</sub>

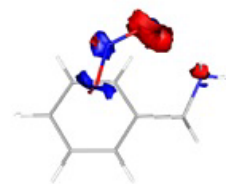

NO<sub>2</sub>...C<sub>6</sub>H<sub>5</sub>.CH<sub>2</sub>NH<sub>2</sub>

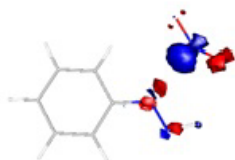

NO<sub>2</sub>...C<sub>6</sub>H<sub>5</sub>.NNH

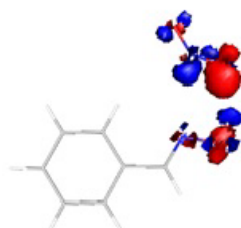

NO<sub>2</sub>...C<sub>6</sub>H<sub>5</sub>-CHNOH

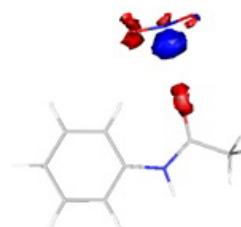

NO<sub>2</sub>...C<sub>6</sub>H<sub>5</sub>-NHCOCH<sub>3</sub>

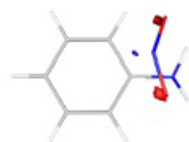

NO<sub>2</sub>...C<sub>6</sub>H<sub>5</sub>-NH<sub>2</sub>

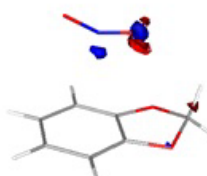

NO<sub>2</sub>...C<sub>6</sub>H<sub>5</sub>-O<sub>2</sub>CH<sub>2</sub>

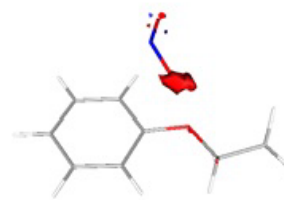

NO<sub>2</sub>...C<sub>6</sub>H<sub>5</sub>-OC<sub>2</sub>H<sub>5</sub>

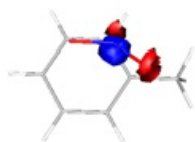

NO<sub>2</sub>...C<sub>6</sub>H<sub>5</sub>-CH<sub>3</sub>

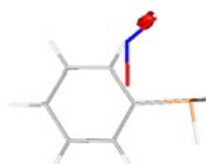

NO<sub>2</sub>...C<sub>6</sub>H<sub>5</sub>-PH<sub>2</sub>

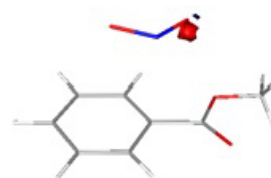

NO<sub>2</sub>...C<sub>6</sub>H<sub>5</sub>-COOCH<sub>3</sub>

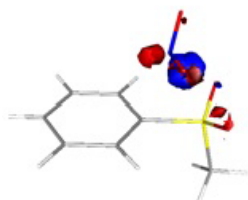

NO<sub>2</sub>...C<sub>6</sub>H<sub>5</sub>-SO<sub>2</sub>CH<sub>3</sub>

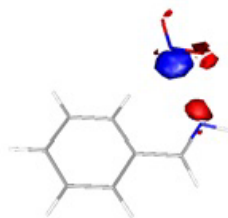

NO<sub>2</sub>...C<sub>6</sub>H<sub>5</sub>-CHNH

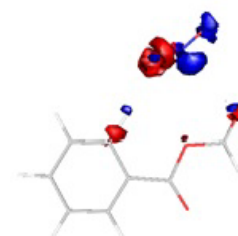

NO<sub>2</sub>...C<sub>6</sub>H<sub>5</sub>-COOCHO

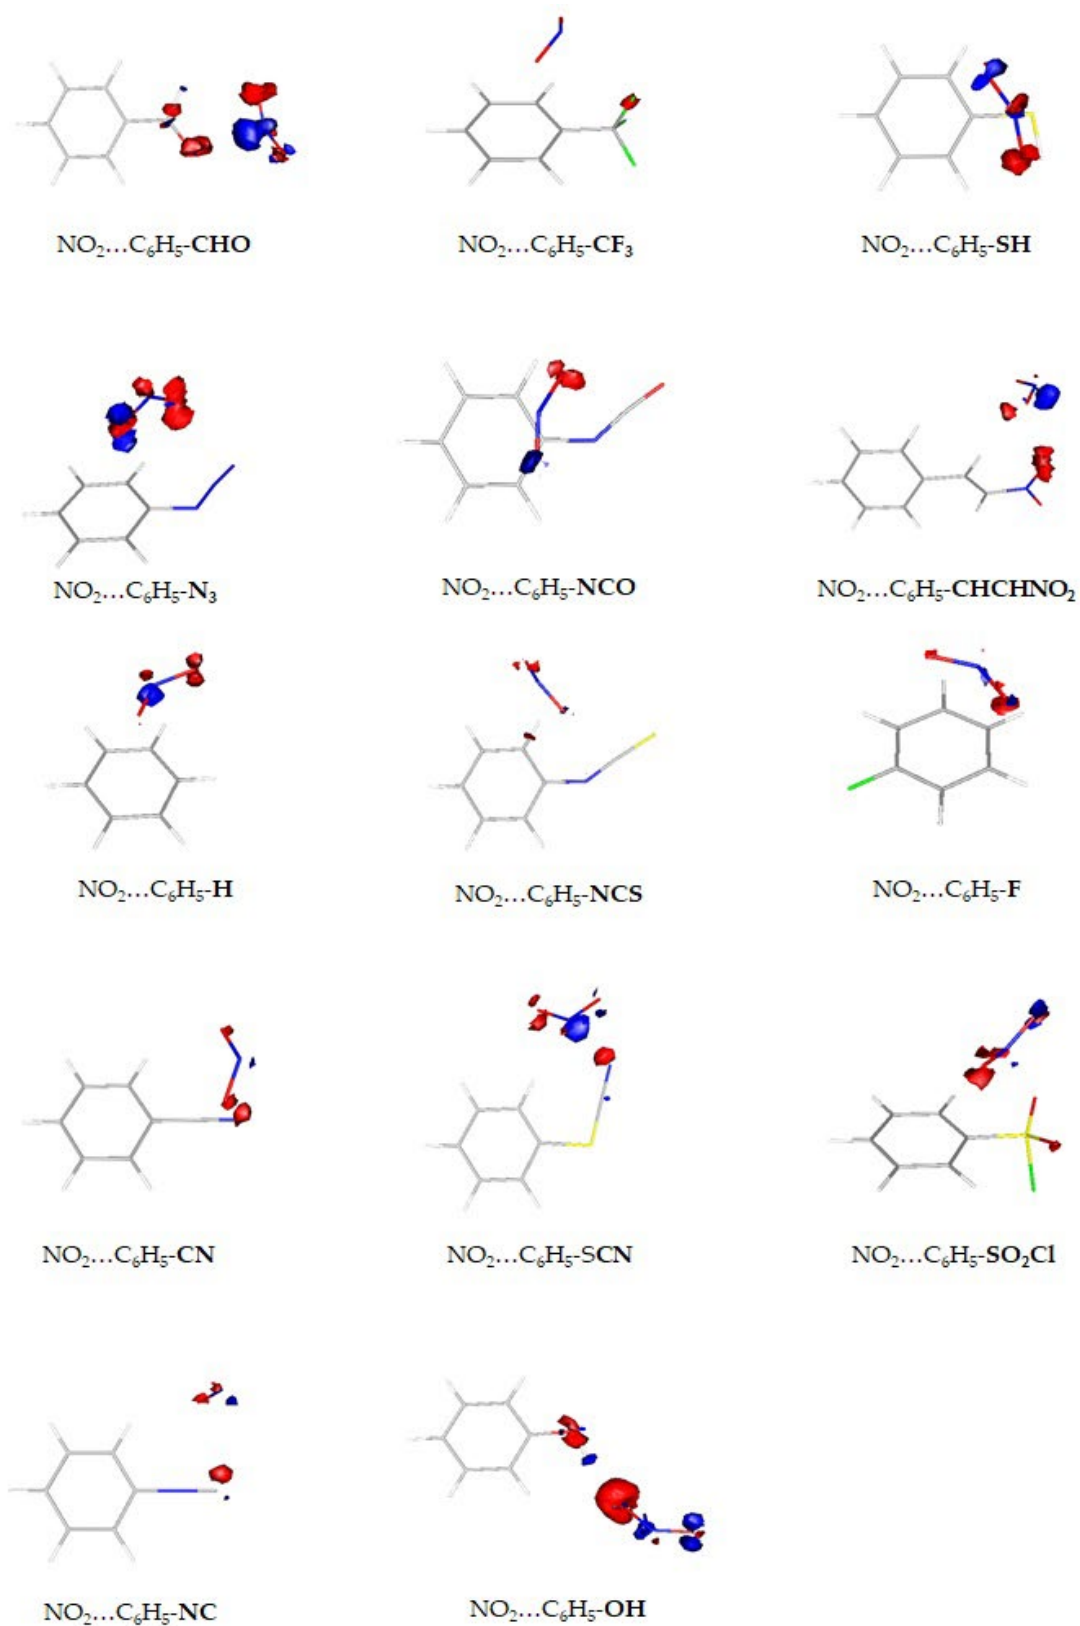

**Figure S2.** Electron density redistribution plots of the optimized geometries of the  $\text{NO}_2 \cdots \text{C}_6\text{H}_5\text{-X}$  complexes. With red and blue the regions that gain and lose electron density upon the formation of the complex, respectively.



## Grand Canonical Monte Carlo

A rigid scan was performed at the RI-DSD-BLYP D3(BJ) /def2-TZVPP level for each functional group selected to determine the interaction energies between the NO<sub>2</sub> molecule and the C<sub>6</sub>H<sub>5</sub>-X.

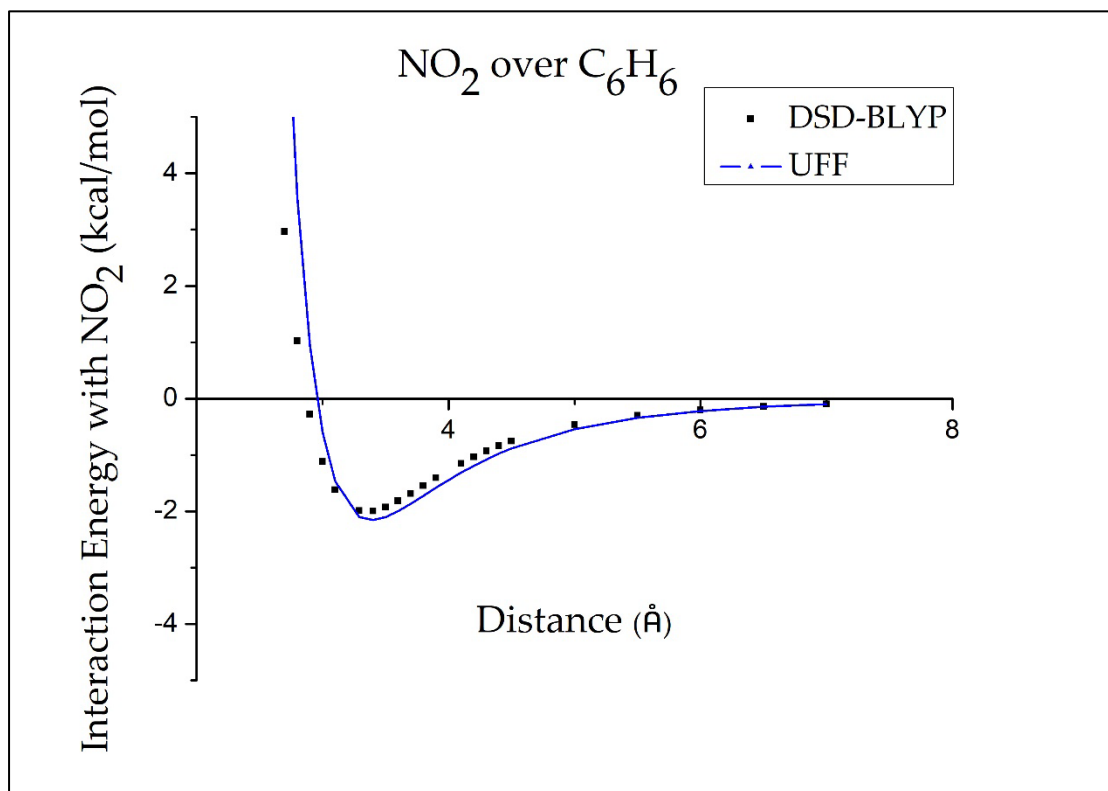

**Figure S3.** Fitting of the ( $\epsilon$ ,  $\sigma$ ) parameters of the UFF [47] potential on the QM data obtained from the DFT scan of NO<sub>2</sub> over benzene.

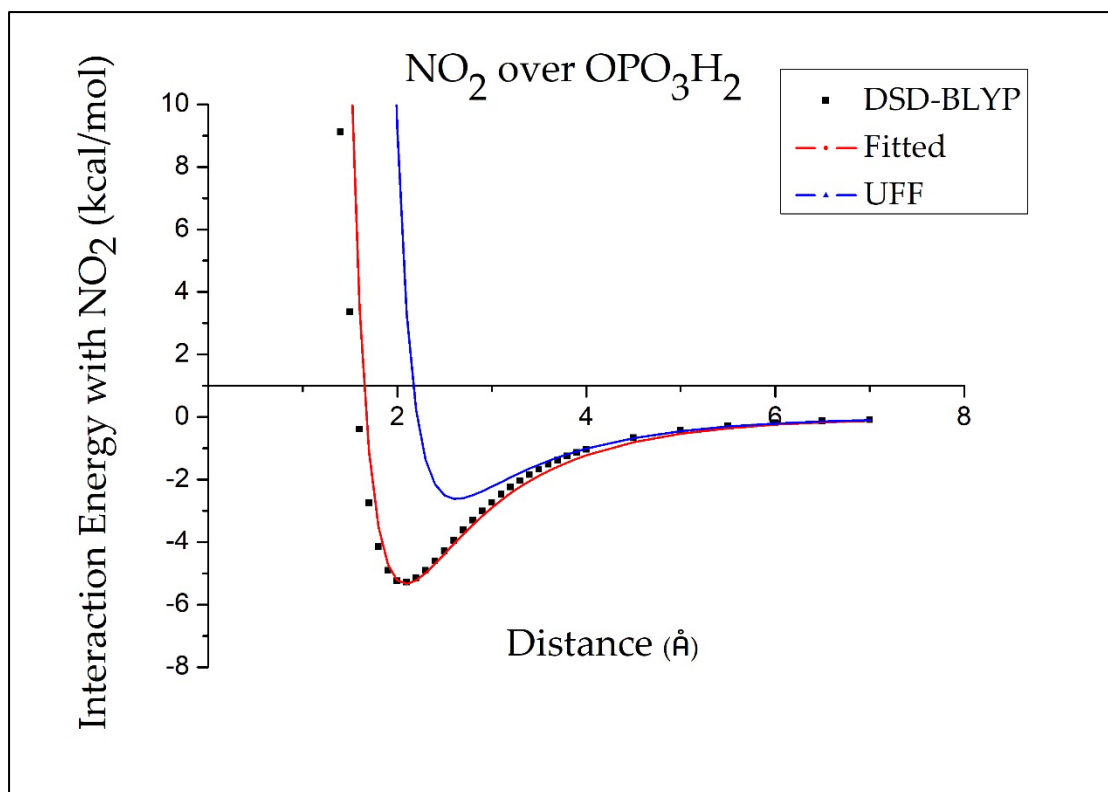

Figure S4. Fitting of the ( $\epsilon$ ,  $\sigma$ ) parameters for the  $\text{NO}_2 \dots \text{C}_6\text{H}_5\text{-OPO}_3\text{H}_2$  interaction.

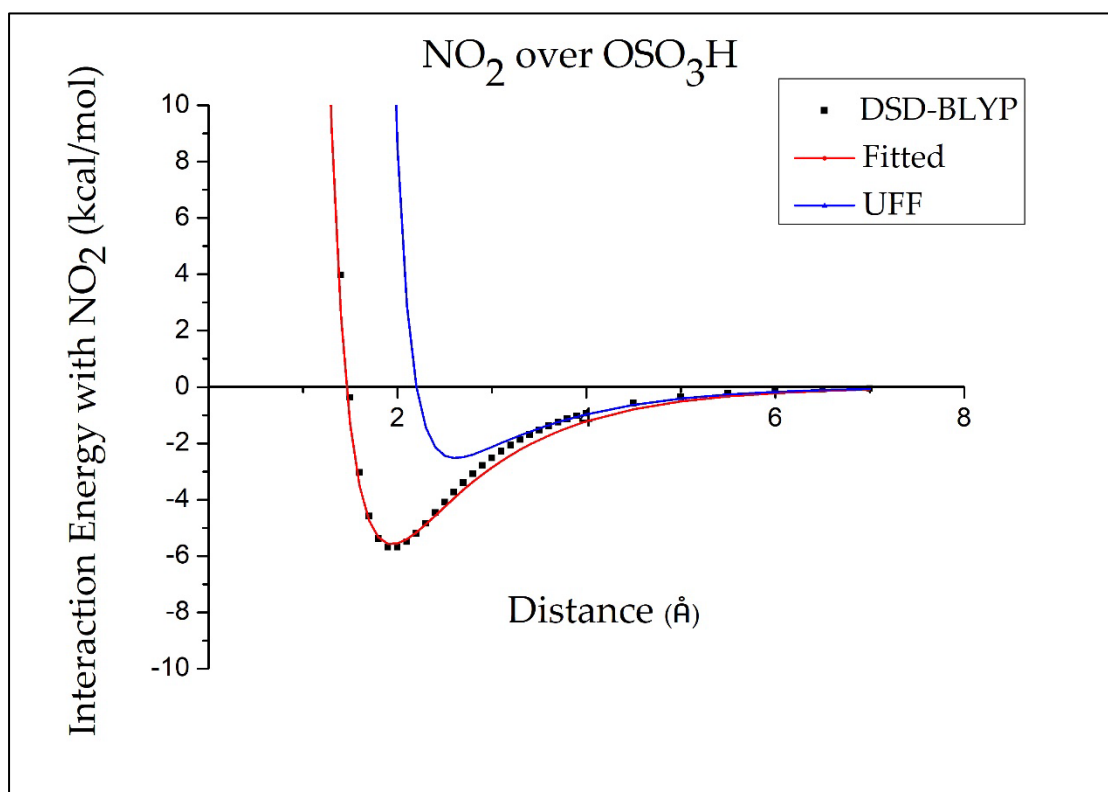

Figure S5. Fitting of the ( $\epsilon$ ,  $\sigma$ ) parameters for the  $\text{NO}_2 \dots \text{C}_6\text{H}_5\text{-OSO}_3\text{H}$  interaction.

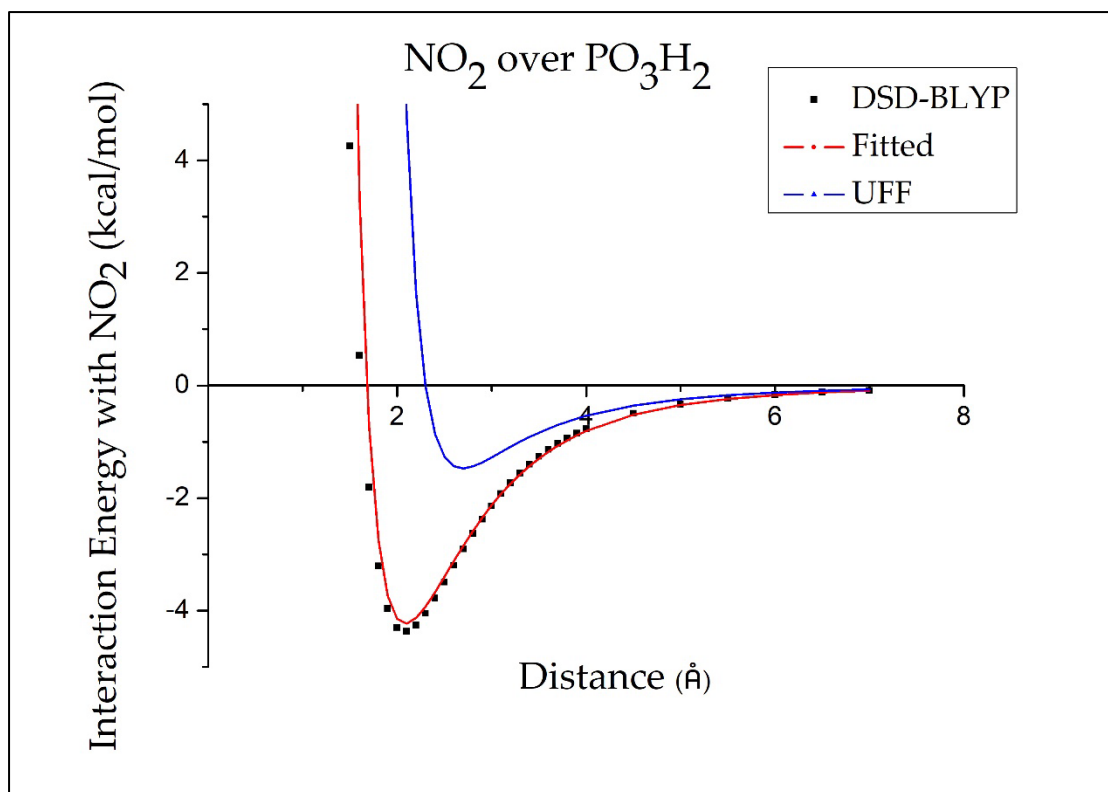

**Figure S6.** Fitting of the ( $\epsilon$ ,  $\sigma$ ) parameters for the  $\text{NO}_2 \dots \text{C}_6\text{H}_5\text{-PO}_3\text{H}_2$  interaction.
